# Supplementary material for: Neonicotinoid-Coated Zea mays Seeds Indirectly Affect Honeybee Performance and Pathogen Susceptibility in Field Trials
Source: PubMed Central journal article supplement (PMC4436261; doi:10.1371/journal.pone.0125790), 2015-05-18

DSCN2419

R24 02/08/12

20µm

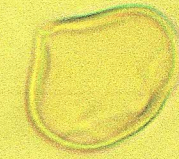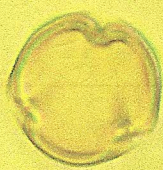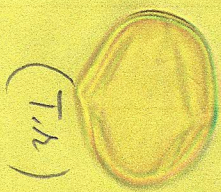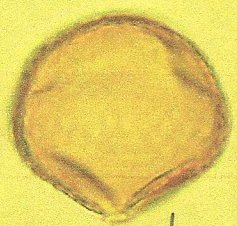

Trisporium type profusum  
(T.P.)

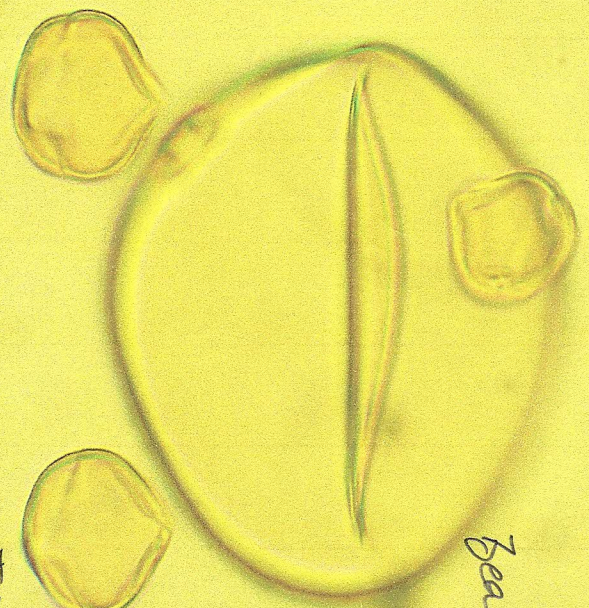

Zea

T.g

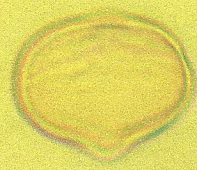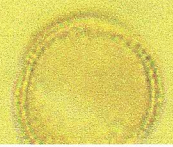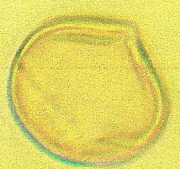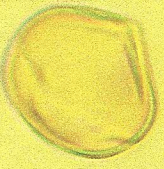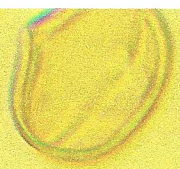

Supplement: pone.0125790.s001.pdf [file pone.0125790.s001.pdf]
