# Supplementary material for: Neonicotinoid-Coated Zea mays Seeds Indirectly Affect Honeybee Performance and Pathogen Susceptibility in Field Trials
Source: PubMed Central journal article supplement (PMC4436261; doi:10.1371/journal.pone.0125790), 2015-05-18
Supplement: pone.0125790.s002.pdf [file pone.0125790.s002.pdf]

Date as fixed effect, Apiary as random, Allowing interaction between variables

#####  
BQCV  
#####

Linear mixed model fit by maximum likelihood ['merModLmerTest']  
Formula: databees\$bqcv ~ dwv \* ache \* varroa \* Treatment + Date + (1 | Apiary)  
Data: databees

AIC BIC logLik deviance df.resid  
483.3 537.0 -222.6 445.3 106

Scaled residuals:  
Min 1Q Median 3Q Max  
-2.1310 -0.7154 -0.2174 0.6100 2.6731

Random effects:  
Groups Name Variance Std.Dev.  
Apiary (Intercept) 0.0153 0.1237  
Residual 2.0491 1.4315  
Number of obs: 125, groups: Apiary, 4

Fixed effects:

|                           | Estimate | Std. Error | df       | t value | Pr(> t )    |
|---------------------------|----------|------------|----------|---------|-------------|
| (Intercept)               | 12.9012  | 3.6948     | 121.2800 | 3.492   | 0.00067 *** |
| dwv                       | -0.2927  | 0.6913     | 120.2100 | -0.423  | 0.67276     |
| ache                      | -4.8183  | 2.1333     | 121.0500 | -2.259  | 0.02570 *   |
| varroa                    | -5.4298  | 5.4733     | 119.5000 | -0.992  | 0.32318     |
| Treatment                 | -19.1765 | 8.2633     | 121.1200 | -2.321  | 0.02198 *   |
| Date                      | -0.5633  | 0.1509     | 121.5600 | -3.732  | 0.00029 *** |
| dwv:ache                  | 0.2908   | 0.4000     | 119.2400 | 0.727   | 0.46861     |
| dwv:varroa                | 0.4005   | 1.2170     | 119.6500 | 0.329   | 0.74263     |
| ache:varroa               | 3.4787   | 3.1361     | 119.6000 | 1.109   | 0.26954     |
| dwv:Treatment             | 4.1424   | 2.6624     | 122.3100 | 1.556   | 0.12231     |
| ache:Treatment            | 10.6525  | 4.4005     | 120.7500 | 2.421   | 0.01698 *   |
| varroa:Treatment          | 12.2821  | 7.8996     | 119.2400 | 1.555   | 0.12265     |
| dwv:ache:varroa           | -0.3121  | 0.6933     | 119.7100 | -0.450  | 0.65345     |
| dwv:ache:Treatment        | -2.1893  | 1.3703     | 121.7900 | -1.598  | 0.11271     |
| dwv:varroa:Treatment      | -2.0881  | 2.1793     | 119.7100 | -0.958  | 0.33990     |
| ache:varroa:Treatment     | -6.8555  | 4.3559     | 119.3200 | -1.574  | 0.11817     |
| dwv:ache:varroa:Treatment | 1.2724   | 1.1757     | 119.6300 | 1.082   | 0.28132     |

---  
Signif. codes: 0 '\*\*\*' 0.001 '\*\*' 0.01 '\*' 0.05 '.' 0.1 ' ' 1

Correlation of Fixed Effects:

|           | (Intr) | dwv    | ache   | varroa | Trtmnt | Date   | dwv:ch | dwv:vr | ach:vr | dwv:Tr | ach:Tr |
|-----------|--------|--------|--------|--------|--------|--------|--------|--------|--------|--------|--------|
| vrr:Tr    |        |        |        |        |        |        |        |        |        |        |        |
| dwv       |        |        |        |        |        |        |        |        |        |        |        |
| ache      |        | -0.878 |        |        |        |        |        |        |        |        |        |
| varroa    |        | -0.982 | 0.865  |        |        |        |        |        |        |        |        |
| Treatment |        | -0.675 | 0.637  | 0.670  |        |        |        |        |        |        |        |
| Date      |        | -0.446 | 0.390  | 0.436  | 0.301  |        |        |        |        |        |        |
| dwv:ache  |        | 0.031  | -0.063 | -0.069 | -0.017 | 0.029  |        |        |        |        |        |
|           |        | 0.861  | -0.975 | -0.880 | -0.635 | -0.385 | -0.006 |        |        |        |        |

```

dvw:varroa  0.538 -0.643 -0.537 -0.906 -0.240  0.004  0.641
ache:varroa 0.669 -0.633 -0.689 -0.988 -0.299  0.011  0.656  0.894
dvw:Tretmnt 0.227 -0.257 -0.222 -0.165 -0.934 -0.025  0.253  0.167  0.164
ache:Trtmnt 0.474 -0.415 -0.480 -0.324 -0.991 -0.031  0.427  0.260  0.333  0.912
varr:Trtmnt 0.466 -0.438 -0.461 -0.692 -0.795 -0.046  0.440  0.628  0.684  0.701  0.796
dvw:ach:vr  -0.538  0.641  0.558  0.899  0.240 -0.008 -0.666 -0.987 -0.910 -0.166 -0.270
-0.623
dvw:ch:Trtm -0.251  0.283  0.255  0.185  0.935  0.024 -0.292 -0.187 -0.191 -0.994 -0.925
-0.710  0.194
dvw:vr:Trt  -0.299  0.356  0.297  0.505  0.811  0.035 -0.358 -0.558 -0.499 -0.846 -0.802
-0.896  0.551  0.854
ach:vr:Trt  -0.481  0.453  0.493  0.710  0.771  0.036 -0.472 -0.644 -0.719 -0.671 -0.789
-0.989  0.655  0.692  0.878
dvw:ch:vr:T  0.316 -0.376 -0.327 -0.530 -0.788 -0.024  0.393  0.582  0.536  0.818  0.792
0.893 -0.589 -0.837 -0.991 -0.892

```

```

#####
DWV
#####
Linear mixed model fit by maximum likelihood ['merModLmerTest']
Formula: databees$dvw ~ bqcv * ache * varroa * Treatment + Date + (1 | Apiary)
Data: databees

```

```

      AIC      BIC  logLik deviance df.resid
500.7    554.4   -231.3   462.7     106

```

```

Scaled residuals:
  Min      1Q  Median      3Q      Max
-2.1855 -0.7253 -0.1208  0.7115  2.2402

```

```

Random effects:
 Groups Name      Variance Std.Dev.
Apiary (Intercept) 0.07284  0.2699
Residual          2.31990  1.5231
Number of obs: 125, groups: Apiary, 4

```

```

Fixed effects:
              Estimate Std. Error   df t value Pr(>|t|)
(Intercept)  -0.71726    5.69049 121.50000  -0.126  0.8999
bqcv          0.31095    0.83059 120.16000   0.374  0.7088
ache         0.29021    3.11686 121.77000   0.093  0.9260
varroa       6.79138    7.07281 120.54000   0.960  0.3389
Treatment    11.44966   10.33849 120.82000   1.107  0.2703
Date         1.13336    0.14369 123.82000   7.888 1.38e-12 ***
bqcv:ache    0.05302    0.49420 120.82000   0.107  0.9147
bqcv:varroa -1.63238    1.36800 120.52000  -1.193  0.2351
ache:varroa -3.01242    3.79833 120.40000  -0.793  0.4293
bqcv:Treatment -2.26555    1.96521 120.06000  -1.153  0.2513
ache:Treatment -6.02029    5.73336 120.42000  -1.050  0.2958
varroa:Treatment -21.62695   11.76479 121.68000  -1.838  0.0685 .
bqcv:ache:varroa  0.65620    0.75553 120.43000   0.869  0.3868
bqcv:ache:Treatment  1.10634    1.13215 120.08000   0.977  0.3304
bqcv:varroa:Treatment  4.32992    2.30035 121.03000   1.882  0.0622 .

```

```

ache:varroa:Treatment      10.26471    6.42239 121.13000    1.598    0.1126
bqcv:ache:varroa:Treatment -2.03966    1.29783 120.65000   -1.572    0.1187

```

---

Signif. codes: 0 '\*\*\*' 0.001 '\*\*' 0.01 '\*' 0.05 '.' 0.1 ' ' 1

Correlation of Fixed Effects:

```

(Intr) bqcv  ache  varroa Trtmnt Date  bqcv:c bqcv:v ach:vr bqcv:T ach:Tr
vrr:Tr bqcv:: bqcv:c:T bqcv:v:T ach::T
bqcv      -0.925
ache      -0.980  0.938
varroa    -0.770  0.705  0.749
Treatment -0.552  0.507  0.535  0.428
Date      -0.024 -0.033 -0.075  0.070  0.081
bqcv:ache  0.843 -0.964 -0.902 -0.636 -0.457  0.099
bqcv:varroa 0.561 -0.582 -0.554 -0.902 -0.314 -0.078  0.547
ache:varroa 0.774 -0.729 -0.776 -0.987 -0.430 -0.060  0.691  0.898
bqcv:Trtmnt 0.392 -0.420 -0.391 -0.303 -0.947 -0.054  0.401  0.251  0.312
ache:Trtmnt 0.536 -0.506 -0.535 -0.415 -0.987 -0.070  0.479  0.310  0.429  0.948
vrr:Trtmnt 0.463 -0.424 -0.451 -0.601 -0.815 -0.034  0.383  0.542  0.593  0.756  0.807
bqcv:ch:vrr -0.553  0.605  0.574  0.867  0.308  0.055 -0.611 -0.980 -0.893 -0.260 -0.318
-0.521
bqcv:ch:Trt -0.370  0.418  0.388  0.283  0.913  0.037 -0.429 -0.245 -0.306 -0.982 -0.943
-0.735  0.271
bqcv:vrr:Tr -0.333  0.347  0.331  0.535  0.745  0.026 -0.327 -0.593 -0.533 -0.767 -0.749
-0.940  0.582  0.761
ach:vrr:Trt -0.458  0.431  0.460  0.583  0.816  0.031 -0.409 -0.531 -0.591 -0.768 -0.828
-0.989  0.528  0.769  0.940
bqcv:ch:v:T 0.322 -0.353 -0.335 -0.504 -0.733 -0.020  0.357  0.570  0.519  0.770  0.759
0.913 -0.582 -0.791  -0.986  -0.936

```

```

#####
ACHE
#####

```

Linear mixed model fit by maximum likelihood [`'merModLmerTest'`]  
Formula: `databees$ache ~ dwv * bqcv * varroa * Treatment + Date + (1 | Apiary)`  
Data: `databees`

```

      AIC      BIC  logLik deviance df.resid
 44.3    98.0    -3.1     6.3     106

```

Scaled residuals:

```

      Min      1Q  Median      3Q      Max
-4.1343 -0.4840  0.1183  0.6344  2.0283

```

Random effects:

```

Groups  Name          Variance Std.Dev.
Apiary  (Intercept)  0.00000  0.0000
Residual                0.06156  0.2481

```

Number of obs: 125, groups: Apiary, 4

Fixed effects:

|                           | Estimate  | Std. Error | df         | t value | Pr(> t ) |     |
|---------------------------|-----------|------------|------------|---------|----------|-----|
| (Intercept)               | 2.161275  | 0.308206   | 124.950000 | 7.012   | 1.3e-10  | *** |
| dvw                       | -0.049698 | 0.064380   | 124.950000 | -0.772  | 0.4416   |     |
| bqcv                      | -0.107375 | 0.061701   | 124.950000 | -1.740  | 0.0843   | .   |
| varroa                    | -0.388218 | 0.430370   | 124.950000 | -0.902  | 0.3688   |     |
| Treatment                 | 0.446184  | 0.672911   | 124.950000 | 0.663   | 0.5085   |     |
| Date                      | 0.061029  | 0.027138   | 124.950000 | 2.249   | 0.0263   | *   |
| dvw:bqcv                  | 0.005855  | 0.012289   | 124.950000 | 0.476   | 0.6346   |     |
| dvw:varroa                | 0.052630  | 0.094181   | 124.950000 | 0.559   | 0.5773   |     |
| bqcv:varroa               | 0.084171  | 0.088936   | 124.950000 | 0.946   | 0.3458   |     |
| dvw:Treatment             | -0.302981 | 0.206077   | 124.950000 | -1.470  | 0.1440   |     |
| bqcv:Treatment            | -0.167538 | 0.150699   | 124.950000 | -1.112  | 0.2684   |     |
| varroa:Treatment          | -0.849082 | 0.726835   | 124.950000 | -1.168  | 0.2450   |     |
| dvw:bqcv:varroa           | -0.009517 | 0.019905   | 124.950000 | -0.478  | 0.6334   |     |
| dvw:bqcv:Treatment        | 0.079849  | 0.043938   | 124.950000 | 1.817   | 0.0716   | .   |
| dvw:varroa:Treatment      | 0.393552  | 0.213210   | 124.950000 | 1.846   | 0.0673   | .   |
| bqcv:varroa:Treatment     | 0.224105  | 0.158859   | 124.950000 | 1.411   | 0.1608   |     |
| dvw:bqcv:varroa:Treatment | -0.086501 | 0.043544   | 124.950000 | -1.987  | 0.0492   | *   |

---

Signif. codes: 0 '\*\*\*' 0.001 '\*\*' 0.01 '\*' 0.05 '.' 0.1 ' ' 1

Correlation of Fixed Effects:

|                | (Intr) | dvw    | bqcv   | varroa | Trtmnt | Date   | dvw:bq | dvw:vr | bqcv:v | dvw:Tr | bqcv:T |
|----------------|--------|--------|--------|--------|--------|--------|--------|--------|--------|--------|--------|
| vrr:Tr         |        |        |        |        |        |        |        |        |        |        |        |
| dvw:b          |        |        |        |        |        |        |        |        |        |        |        |
| dvw:b:T        |        |        |        |        |        |        |        |        |        |        |        |
| dvw:v:T        |        |        |        |        |        |        |        |        |        |        |        |
| bqcv::T        |        |        |        |        |        |        |        |        |        |        |        |
| dvw            |        | -0.847 |        |        |        |        |        |        |        |        |        |
| bqcv           |        | -0.919 | 0.780  |        |        |        |        |        |        |        |        |
| varroa         |        | -0.805 | 0.757  | 0.726  |        |        |        |        |        |        |        |
| Treatment      |        | -0.446 | 0.406  | 0.415  | 0.372  |        |        |        |        |        |        |
| Date           |        | -0.133 | -0.211 | 0.067  | -0.036 | -0.027 |        |        |        |        |        |
| dvw:bqcv       |        | 0.817  | -0.908 | -0.884 | -0.693 | -0.382 | 0.084  |        |        |        |        |
| dvw:varroa     |        | 0.711  | -0.807 | -0.631 | -0.918 | -0.331 | 0.061  | 0.729  |        |        |        |
| bqcv:varroa    |        | 0.727  | -0.672 | -0.754 | -0.937 | -0.334 | 0.018  | 0.707  | 0.863  |        |        |
| dvw:Treatment  |        | 0.269  | -0.305 | -0.246 | -0.235 | -0.914 | 0.031  | 0.281  | 0.250  | 0.209  |        |
| bqcv:Treatment |        | 0.369  | -0.331 | -0.406 | -0.299 | -0.964 | 0.030  | 0.367  | 0.262  | 0.310  | 0.888  |
| vrr:Treatment  |        | 0.477  | -0.447 | -0.430 | -0.592 | -0.889 | 0.017  | 0.410  | 0.543  | 0.555  | 0.808  |
| dvw:bqcv:vr    |        | -0.617 | 0.703  | 0.629  | 0.845  | 0.289  | -0.071 | -0.729 | -0.932 | -0.906 | -0.217 |
|                |        | -0.500 |        |        |        |        |        |        |        |        |        |
| dvw:bqcv:Tr    |        | -0.226 | 0.258  | 0.246  | 0.194  | 0.896  | -0.041 | -0.281 | -0.205 | -0.198 | -0.976 |
|                |        | -0.781 | 0.205  |        |        |        |        |        |        |        |        |
| dvw:vrr:Trt    |        | -0.313 | 0.357  | 0.278  | 0.406  | 0.849  | -0.030 | -0.322 | -0.442 | -0.381 | -0.917 |
|                |        | -0.913 | 0.412  | 0.881  |        |        |        |        |        |        |        |
| bqcv:vrr:Tr    |        | -0.403 | 0.382  | 0.420  | 0.526  | 0.865  | -0.040 | -0.398 | -0.485 | -0.560 | -0.788 |
|                |        | -0.963 | 0.509  | 0.803  | 0.882  |        |        |        |        |        |        |
| dvw:bqcv::T    |        | 0.279  | -0.326 | -0.286 | -0.387 | -0.842 | 0.051  | 0.335  | 0.427  | 0.414  | 0.900  |
|                |        | 0.898  | -0.458 | -0.907 | -0.971 | -0.922 |        |        |        |        |        |
